# Supplementary material for: The response regulator Skn7 of Aspergillus fumigatus is essential for the antifungal effect of fludioxonil
Source: PubMed Central journal article supplement (PMC7935864; doi:10.1038/s41598-021-84740-6), 2021-03-05
Supplement: 41598_2021_84740_MOESM1_ESM.pdf [file 41598_2021_84740_MOESM1_ESM.pdf]

- **Supplementary Files** -

**The response regulator Skn7 of *Aspergillus fumigatus* is essential for the antifungal effect of fludioxonil.**

Sebastian Schruefer<sup>1#</sup>, Isabella Böhmer<sup>1#</sup>, Karl Dichtl<sup>2</sup>, Anja Spadinger<sup>1</sup>,  
Christoph Kleinemeier<sup>1</sup>, Frank Ebel<sup>1</sup>

1: Institute for Infectious Diseases and Zoonoses, Faculty of Veterinary Medicine, LMU  
Munich, Germany

2: Max von Pettenkofer Institute, Faculty of Medicine, LMU Munich, Germany

## Supplementary Figure 1:

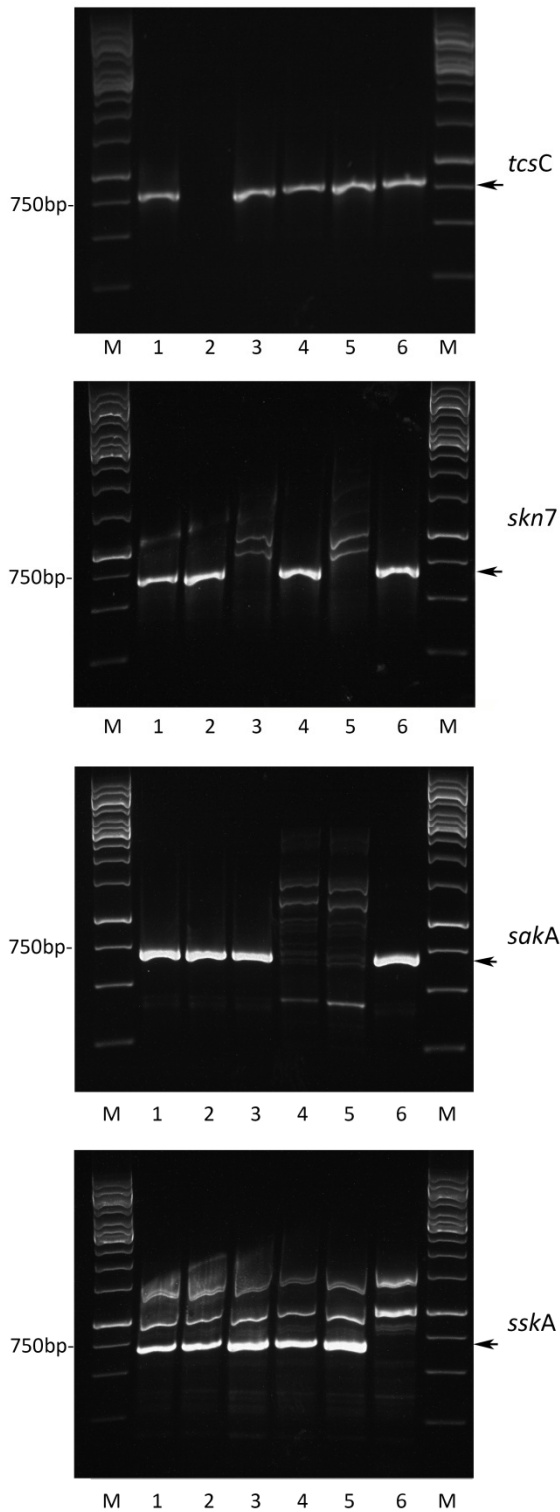

PCR analysis of the different strains used in this study. We have amplified fragments of approximately 700 bp of the genes indicated on the right margin from chromosomal DNA of the different strains using oligonucleotides that are specified in Suppl. Table 1. M = marker; 1 = AfS35; 2 =  $\Delta tcsC$ ; 3 =  $\Delta skn7$ ; 4 =  $\Delta sakA$ , 5 =  $\Delta skn7 \Delta sakA$ ; 6 =  $\Delta sskA$ . The specific amplicons are indicated by arrows.

## Supplementary Figure 2:

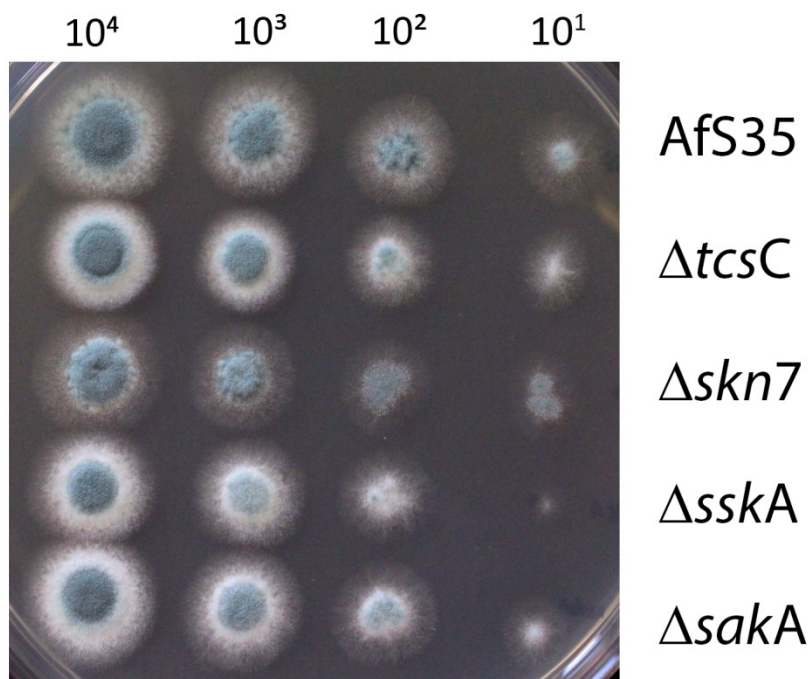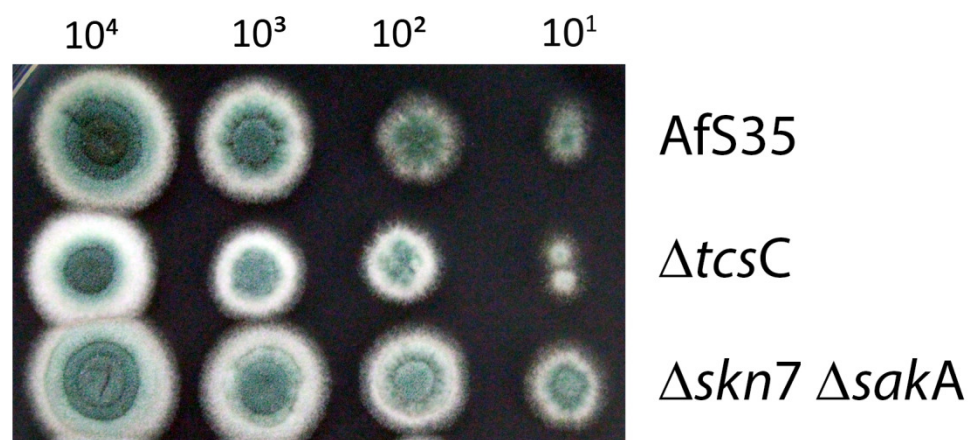

Growth of the *A. fumigatus* HOG pathway mutants on AMM agar. The drop dilution assays were incubated at 37°C for 48h. The strains and the number of conidia that were applied per drop are indicated.

### Supplementary Figure 3:

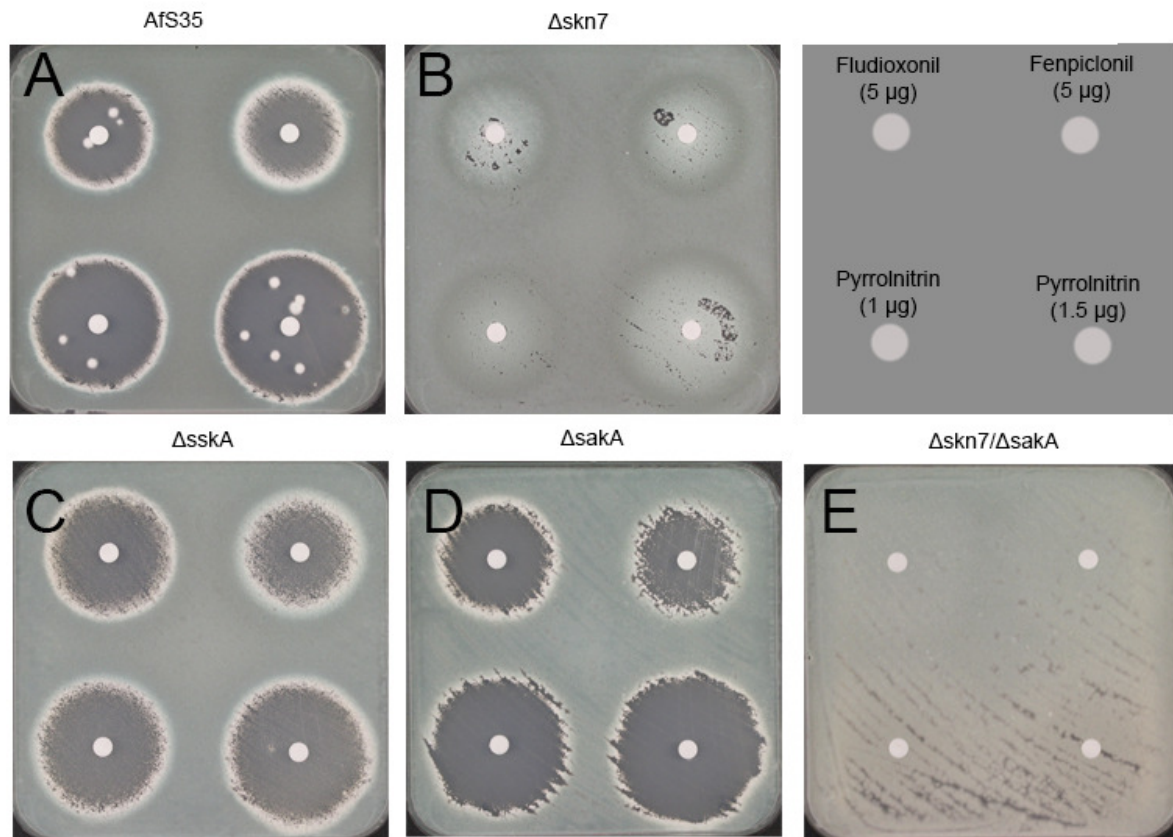

Comparison of the sensitivities of the indicated mutants to fludioxonil, fenpiclonil and pyrrolnitrin. Paper disks containing 5  $\mu$ g fludioxonil, 5  $\mu$ g fenpiclonil and 1 and 1.5  $\mu$ g pyrrolnitrin were placed on plates that were inoculated with conidia of the following strains: *AfS35* (A),  $\Delta skn7$  (B),  $\Delta sskA$  (C),  $\Delta sakA$  (D) and  $\Delta skn7 \Delta sakA$  (E). The plates were incubated at 37°C and images were taken after for 48h.

### Supplementary Figure 4:

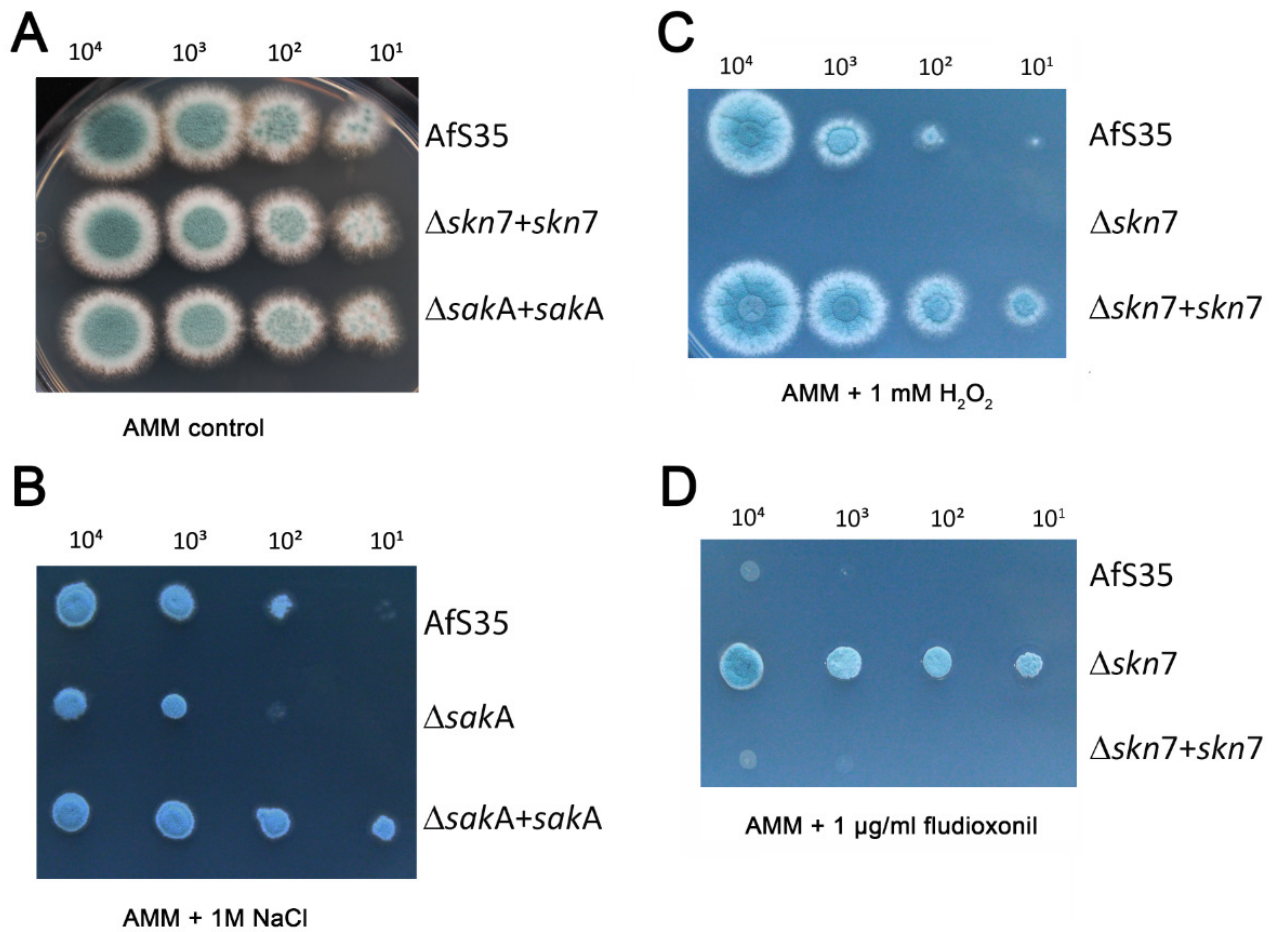

Functional complementation of the  $\Delta sakA$  and the  $\Delta skn7$  mutant. Panel A: Drop dilution assay on an AMM plate without supplements demonstrating a normal growth for the two complemented mutants. Panel B: The  $\Delta sakA+sakA$  strain shows a wild type-like resistance to high salt stress on AMM containing 1 M NaCl. Panels C and D: Drop dilution assays on AMM plates containing 1 mM H<sub>2</sub>O<sub>2</sub> (C) or 1  $\mu$ g/ml fludioxonil demonstrate the functional complementation of the  $\Delta skn7$  mutant (D).



Supplementary Figure 5:

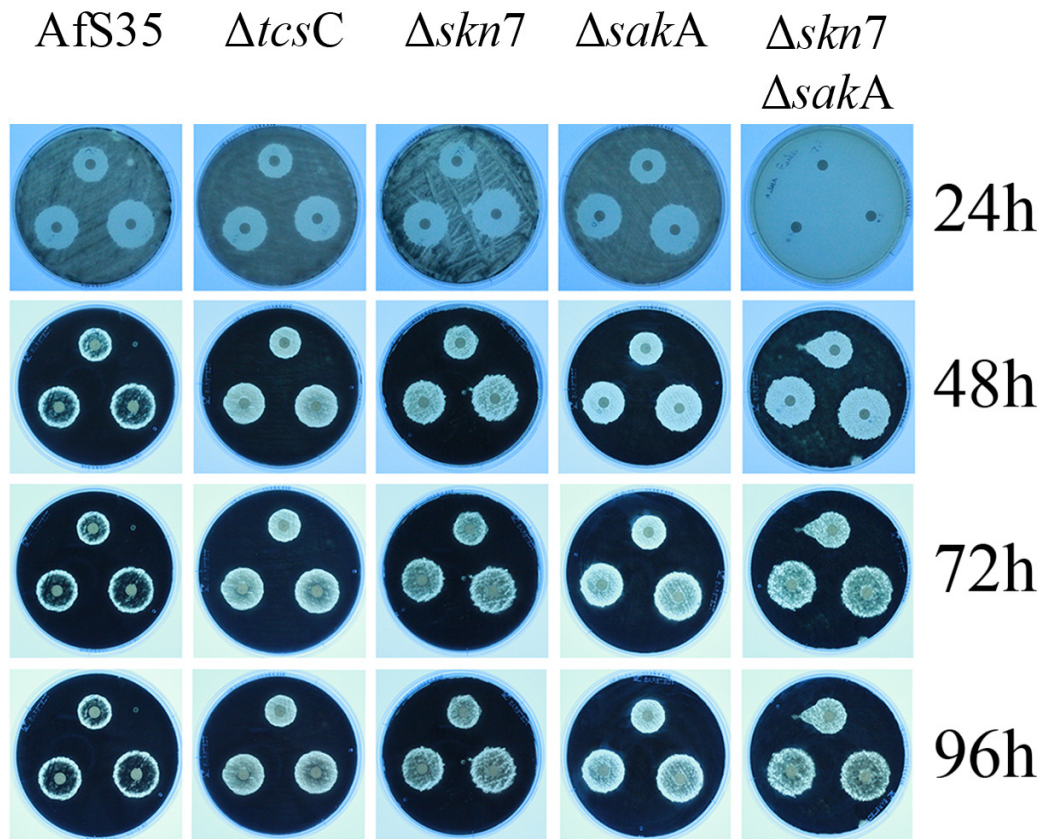

The HOG mutants show a reduced trailing growth on plates with paper disks containing 2.5  $\mu\text{g}$  (top), 10  $\mu\text{g}$  (left) or 20  $\mu\text{g}$  (right) caspofungin. The AMM plates were inoculated with resting conidia and incubated at 37°C for the times indicated. Note that the trailing growth in the inhibition zones is most prominent for the wild type strain *AfS35*. This is also the only strain that sporulated well in the inhibition zone.

## Supplementary Figure 6:

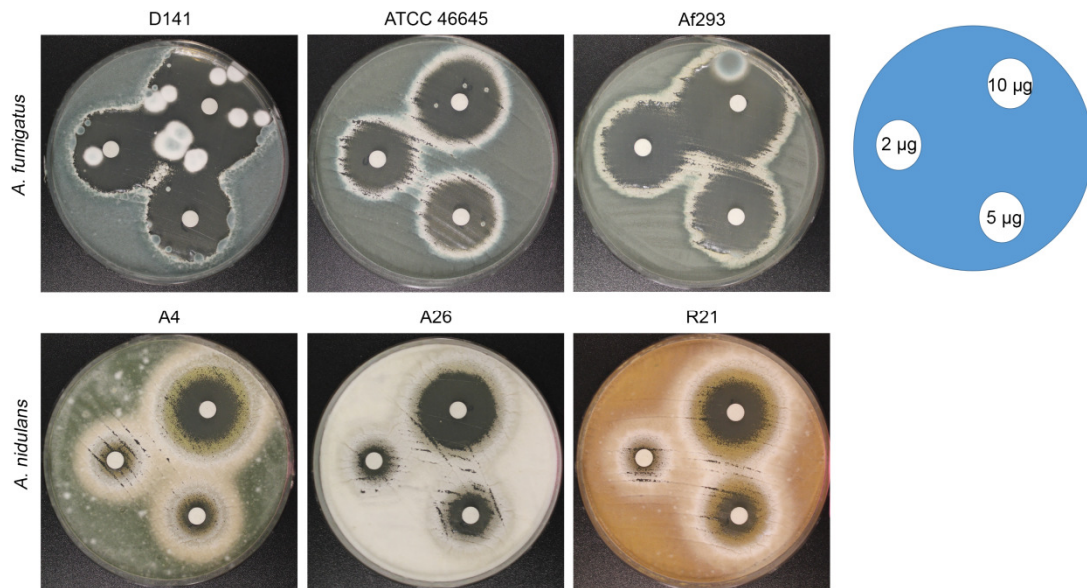

*A. fumigatus* strains are more susceptible to fludioxonil than *A. nidulans* strains. Sabouraud plates were inoculated with resting conidia of the *A. fumigatus* strains D141, ATCC 46645 and Af293 or the *A. nidulans* strains R21, A26 and A4. Paper disks with the indicated amounts of fludioxonil were then placed on the plates and images were taken after an incubation of 48h at 37°C.

Supplementary Table 1: Oligos used in this study

| Designation          | Sequence                          | Experiment                                                   |
|----------------------|-----------------------------------|--------------------------------------------------------------|
| SakA-1000bp-up-FOR   | TTGATTTCTCCTCTAAGCCCG             | deletion of <i>sakA</i> up-stream                            |
| SakA-1000up-REV-SfiI | GCGGCCTGAGTGGCCTTTGGATAGTGTGGGTGG | deletion of <i>sakA</i> up-stream                            |
| SakA-1000do-FOR-SfiI | GCGGCCATCTAGGCCAAGTGGTCACCATGTGCA | deletion of <i>sakA</i> down-stream                          |
| SakA-1000bp-do-REV   | AACACGATACAATGGGGTCTC             | deletion of <i>sakA</i> down-stream                          |
| SakA-FOR             | ATGGCCGAGTTCGTGCGT                | complementation of $\Delta$ <i>sakA</i>                      |
| SakA-REV             | TTATGCATAGTTTTGTTG                | complementation of $\Delta$ <i>sakA</i>                      |
| SskA-1000bp-up-FOR   | ATGTTTTTTCAGAGAGCGCCA             | deletion of <i>sskA</i> up-stream                            |
| SskA-1000up-REV-SfiI | GCGGCCTGAGTGGCCGATGAGGATCCACCACAG | deletion of <i>sskA</i> up-stream                            |
| SskA-1000do-FOR-SfiI | GCGGCCATCTAGGCCCCAGTTGCACTTTCTGCA | deletion of <i>sskA</i> down-stream                          |
| SskA-1000bp-do-REV   | AACGCAAGAGACTCGCCAAGG             | deletion of <i>sskA</i> down-stream                          |
| Skn7-1000up-For      | GCGTTAGGACTTGGGACC                | deletion of <i>skn7</i> up-stream                            |
| Skn7-1000up-REV-SfiI | GCGGCCTGAGTGGCCCGTGGGCTAGATGGG    | deletion of <i>skn7</i> up-stream                            |
| Skn7-1000do-FOR-SfiI | GTGGCCATCTAGGCCGGTGAGAACAGTCGA    | deletion of <i>skn7</i> down-stream                          |
| Skn7-1000do-REV      | ACCTCGGGCGGTCAGCGA                | deletion of <i>skn7</i> down-stream                          |
| Skn7-ATG-FOR         | ATGGAGGGTGGCCAGACC                | complementation of $\Delta$ <i>skn1</i>                      |
| Skn7-REV             | TTAGCCACTTCGAGTAGC                | complementation of $\Delta$ <i>skn1</i><br>P <sub>epdA</sub> |
| Skn7-Pro-PstI-FOR    | GACTGCAGCTGAGGACGATCATAATGCA      | complementation of $\Delta$ <i>skn1</i> P <sub>skn7</sub>    |
| SakA-FOR             | ATGGCCGAGTTCGTGCGT                | PCR detection of <i>sakA</i>                                 |
| SakA-700-REV         | AATACATGGTTAGCGTTC                | PCR detection of <i>sakA</i>                                 |
| SskA-FOR             | ATGCCTGACCGCCGCTG                 | PCR detection of <i>sskA</i>                                 |
| SskA-700-REV         | GCACGCTGGAATTTTCTC                | PCR detection of <i>sskA</i>                                 |
| Skn7-ATG-FOR         | ATGGAGGGTGGCCAGACC                | PCR detection of <i>skn7</i>                                 |
| Skn7-700-REV         | CTTGCTGTTCGCTCTGAA                | PCR detection of <i>skn7</i>                                 |
| TcsC-His-FOR         | GCGAATTCAACCTATGATTCAAATAC        | PCR detection of <i>tcsC</i>                                 |
| Tco1-REV             | TTCTCATACGGCCTTTGGAGAGCG          | PCR detection of <i>tcsC</i>                                 |
